# Supplementary material for: A dural lymphatic vascular system that drains brain interstitial fluid and macromolecules
Source: PubMed Central journal article supplement — J Exp Med. 2015 Jun 29;212(7):991–9. doi: 10.1084/jem.20142290 (PMC4493418; doi:10.1084/jem.20142290), 2015-06-29
Supplement: supp_jem.20142290_JEM_20142290_sm.pdf [file supp_jem.20142290_JEM_20142290_sm.pdf]

## SUPPLEMENTAL MATERIAL

Aspelund et al., <http://www.jem.org/cgi/content/full/jem.20142290/DC1>

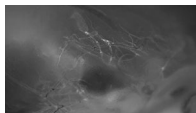

**Video 1. Dura mater lymphatic vasculature in the *Prox1-GFP* mouse.** Video showing dura mater lymphatic vessels in the lateral aspects of the interior portions of the skull in sagittal plane in the *Prox1-GFP* mouse (grayscale).
